# Supplementary material
Source: PubMed Central journal article supplement (PMC9436934)
Supplement: 41431_2022_1127_MOESM1_ESM.pdf [file 41431_2022_1127_MOESM1_ESM.pdf]

| <b><u>IPQ-R-TANGO2 Subscale</u></b> | <b><u>Higher score indicates...</u></b>                                         |
|-------------------------------------|---------------------------------------------------------------------------------|
| Identity                            | Stronger belief that symptoms are attributable to TANGO2 disorder               |
| Timeline Acute/Chronic              | Stronger belief that symptoms will be chronic                                   |
| Consequences                        | Stronger belief that TANGO2 disorder has negative consequences                  |
| Personal control                    | Stronger belief in personal control over disease course                         |
| Treatment control                   | Stronger belief in effective treatments to control disease course               |
| Illness coherence                   | Stronger belief in personal understanding of TANGO2 disorder                    |
| Timeline cyclical                   | Stronger belief that symptoms of TANGO2 disorder are cyclical                   |
| Emotional Representations           | Stronger belief that TANGO2 disorder has significant negative emotional effects |
| Cause                               | Each item assessed independently                                                |

**Supplemental Table 1.** IPQ-R-TANGO2 subscales and corresponding interpretations of high scores on each subscale.

|                                    | <u>Child Report</u> |      | <u>Parent Proxy-Report</u> |      |                   |      |             |      |            |      |                   |      |
|------------------------------------|---------------------|------|----------------------------|------|-------------------|------|-------------|------|------------|------|-------------------|------|
|                                    |                     |      | Toddler (n=13)             |      | Young Child (n=4) |      | Child (n=4) |      | Teen (n=6) |      | Young Adult (n=2) |      |
|                                    | Mean                | SD   | Mean                       | SD   | Mean              | SD   | Mean        | SD   | Mean       | SD   | Mean              | SD   |
| <b>Total Score</b>                 | 52.9                | 16.8 | 75.8                       | 13.7 | 47.3              | 11.2 | 51.1        | 19.5 | 43.3       | 11.5 | 57.6              | 13.8 |
| <b>Physical Health Summary</b>     | 51.2                | 22.8 | 78.4                       | 21   | 41.4              | 18.5 | 44.5        | 18.5 | 47.9       | 19   | 34.4              | 35.4 |
| <b>Psychosocial Health Summary</b> | 53.8                | 18.9 | 73.4                       | 12.8 | 49.2              | 12.3 | 53.9        | 20.3 | 40.8       | 10.8 | 67.2              | 4.4  |
| <b>Emotional Functioning</b>       | 71.9                | 21.1 | 70                         | 13.3 | 71.9              | 7.1  | 65.6        | 17.5 | 56.7       | 10.8 | 66.7              | 5.9  |
| <b>Social Functioning</b>          | 48.8                | 30.3 | 78.1                       | 15.5 | 41.3              | 22.9 | 41.3        | 28.7 | 35.8       | 18.8 | 80                | 7.1  |
| <b>School Functioning</b>          | 40.6                | 28.9 | 62.5                       | 14.8 | 30                | 18.7 | 52.5        | 22.2 | 30         | 19.5 | 55                | 14.1 |

**Supplemental Table 2.** Mean scores and standard deviations on PedsQL™ core scales, summary scales, and total scale in patients with *TANGO2* disorder, organized by child-report and parent proxy-report by age group.

| <b>PedsQL Score</b>               | <b>TANGO2</b> | <b>Healthy</b> | <b>p-value</b> |
|-----------------------------------|---------------|----------------|----------------|
| Total Score                       | 60.5 (19.4)   | 87.6 (12.3)    | <0.001         |
| n                                 | 29            | 717            |                |
| Physical Health Summary Score     | 59.3 (26.3)   | 89.3 (16.4)    | <0.001         |
| n                                 | 29            | 717            |                |
| Psychosocial Health Summary Score | 60.2 (18.4)   | 86.6 (12.8)    | <0.001         |
| n                                 | 29            | 717            |                |
| Emotional Functioning Scale Score | 66.6 (12.9)   | 82.6 (17.5)    | <0.001         |
| n                                 | 28            | 718            |                |
| Social Functioning Scale Score    | 59.3 (26.8)   | 79.8 (21.9)    | <0.001         |
| n                                 | 29            | 716            |                |
| School Functioning Scale Score    | 46.7 (22.1)   | 71.1 (24.0)    | <0.001         |
| n                                 | 24            | 611            |                |

**Supplemental Table 3.** PedsQL™ mean scores by parent proxy-report compared between children with TANGO2 disorder (all ages) and healthy children as reported by Varni et al. 2001 (ref. 18)

## APPENDIX 1

### IPQ-R-TANGO2

Your Observations of Your Child's *TANGO2*-related disorder

Below are a number of symptoms associated with *TANGO2*-related disorder (“disease”) that you may or may not have seen in your child. Please indicate by checking yes or no, if you observe any of these symptoms, and whether you think these symptoms are related to your child’s diagnosis.

Please provide one response, for each column, per question.

| Symptom                                               | I have observed this symptom in my child. |                          | I believe this symptom is associated with my child’s disease. |                          |
|-------------------------------------------------------|-------------------------------------------|--------------------------|---------------------------------------------------------------|--------------------------|
|                                                       | Yes                                       | No                       | Yes                                                           | No                       |
| 1. Metabolic crisis                                   | <input type="checkbox"/>                  | <input type="checkbox"/> | <input type="checkbox"/>                                      | <input type="checkbox"/> |
| 2. Developmental delay (late to achieve/learn skills) | <input type="checkbox"/>                  | <input type="checkbox"/> | <input type="checkbox"/>                                      | <input type="checkbox"/> |
| 3. Developmental regression (loss of skills)          | <input type="checkbox"/>                  | <input type="checkbox"/> | <input type="checkbox"/>                                      | <input type="checkbox"/> |
| 4. Seizures                                           | <input type="checkbox"/>                  | <input type="checkbox"/> | <input type="checkbox"/>                                      | <input type="checkbox"/> |
| 5. Muscle weakness                                    | <input type="checkbox"/>                  | <input type="checkbox"/> | <input type="checkbox"/>                                      | <input type="checkbox"/> |
| 6. Clumsiness or ataxia (unsteady walking)            | <input type="checkbox"/>                  | <input type="checkbox"/> | <input type="checkbox"/>                                      | <input type="checkbox"/> |
| 7. Loss of consciousness                              | <input type="checkbox"/>                  | <input type="checkbox"/> | <input type="checkbox"/>                                      | <input type="checkbox"/> |
| 8. Speech problems                                    | <input type="checkbox"/>                  | <input type="checkbox"/> | <input type="checkbox"/>                                      | <input type="checkbox"/> |
| 9. Rhabdomyolysis (breakdown of muscles)              | <input type="checkbox"/>                  | <input type="checkbox"/> | <input type="checkbox"/>                                      | <input type="checkbox"/> |
| 10. Arrhythmia (abnormal heart rhythms)               | <input type="checkbox"/>                  | <input type="checkbox"/> | <input type="checkbox"/>                                      | <input type="checkbox"/> |
| 11. Intellectual disability or learning disability    | <input type="checkbox"/>                  | <input type="checkbox"/> | <input type="checkbox"/>                                      | <input type="checkbox"/> |
| 12. Abnormal thyroid hormone levels                   | <input type="checkbox"/>                  | <input type="checkbox"/> | <input type="checkbox"/>                                      | <input type="checkbox"/> |
| 13. Digestion problems                                | <input type="checkbox"/>                  | <input type="checkbox"/> | <input type="checkbox"/>                                      | <input type="checkbox"/> |
| 14. Hearing loss                                      | <input type="checkbox"/>                  | <input type="checkbox"/> | <input type="checkbox"/>                                      | <input type="checkbox"/> |

We are interested in your own personal views of how you see your child’s *TANGO2*-related disorder. Please indicate how much you agree or disagree with the following statements about your child’s *TANGO2*-related disorder (“disease”) by checking the appropriate box.

|  |       |                   |          |                            |       |                |
|--|-------|-------------------|----------|----------------------------|-------|----------------|
|  | Views | Strongly Disagree | Disagree | Neither Disagree Nor Agree | Agree | Strongly Agree |
|--|-------|-------------------|----------|----------------------------|-------|----------------|

|    |                                                                          |  |  |  |  |  |
|----|--------------------------------------------------------------------------|--|--|--|--|--|
| 1  | My child's disease will last a short time                                |  |  |  |  |  |
| 2  | My child's disease is likely to be permanent rather than temporary       |  |  |  |  |  |
| 3  | My child's disease will last a long time                                 |  |  |  |  |  |
| 4  | My child's disease will pass quickly                                     |  |  |  |  |  |
| 5  | I expect my child will have this disease for the rest of his/her life.   |  |  |  |  |  |
| 6  | My child's disease is a serious condition                                |  |  |  |  |  |
| 7  | My child's disease has major consequences on my life                     |  |  |  |  |  |
| 8  | My child's disease does not have much effect on my life                  |  |  |  |  |  |
| 9  | My child's disease strongly affects the way others see me                |  |  |  |  |  |
| 10 | My child's disease has serious financial consequences                    |  |  |  |  |  |
| 11 | My child's disease causes difficulties for those who are close to me     |  |  |  |  |  |
| 12 | There is a lot I can do to control my child's disease symptoms           |  |  |  |  |  |
| 13 | What I do can determine whether my child's disease gets better or worse  |  |  |  |  |  |
| 14 | The course of my child's disease depends on me                           |  |  |  |  |  |
| 15 | Nothing I do will affect my child's disease                              |  |  |  |  |  |
| 16 | I have the power to affect my child's disease                            |  |  |  |  |  |
| 17 | My actions will have no effect on the outcome of my child's disease      |  |  |  |  |  |
| 18 | My child's disease will improve with time                                |  |  |  |  |  |
| 19 | There is very little that can be done to improve my child's disease      |  |  |  |  |  |
| 20 | Treatment for my child's disease will be effective in curing him/her     |  |  |  |  |  |
| 21 | The negative effects of my child's disease can be prevented by treatment |  |  |  |  |  |
| 22 | Treatment can control my child's disease                                 |  |  |  |  |  |
| 23 | There is nothing that can help my child's disease                        |  |  |  |  |  |

|    |                                                                             |  |  |  |  |  |
|----|-----------------------------------------------------------------------------|--|--|--|--|--|
| 24 | The symptoms of my child's disease are puzzling                             |  |  |  |  |  |
| 25 | My child's disease is a mystery to me                                       |  |  |  |  |  |
| 26 | I don't understand my child's disease                                       |  |  |  |  |  |
| 27 | My child's disease doesn't make sense to me                                 |  |  |  |  |  |
| 28 | I have a clear picture or understanding of my child's disease               |  |  |  |  |  |
| 29 | The symptoms of my child's disease change a great deal from day to day      |  |  |  |  |  |
| 30 | My child's symptoms of disease come and go in cycles                        |  |  |  |  |  |
| 31 | My child's disease is very unpredictable                                    |  |  |  |  |  |
| 32 | My child goes through cycles in which his/her disease gets better and worse |  |  |  |  |  |
| 33 | I get depressed when I think about my child's disease                       |  |  |  |  |  |
| 34 | When I think about my child's disease I get upset                           |  |  |  |  |  |
| 35 | My child's disease makes me feel angry                                      |  |  |  |  |  |
| 36 | My child's disease does not worry me                                        |  |  |  |  |  |
| 37 | That my child has this disease makes me feel anxious                        |  |  |  |  |  |
| 38 | My child's disease makes me feel afraid                                     |  |  |  |  |  |

Causes of your child's *TANGO2*-related disorder

We are interested in what you consider as likely contributing factors for your child's *TANGO2*-related disorder ("disease"). There is no correct answer to this question. What interests us most is your own perspective on the factors that may have caused your child's disease rather than what others, including a physician or other professional, may have suggested. Below is a list of some parents' opinions. Please indicate to what extent you agree or disagree with these causes by checking the appropriate box.

|    | <b>Views</b>                                                      | <b>Strongly Disagree</b> | <b>Disagree</b> | <b>Neither Disagree Nor Agree</b> | <b>Agree</b> | <b>Strongly Agree</b> |
|----|-------------------------------------------------------------------|--------------------------|-----------------|-----------------------------------|--------------|-----------------------|
| 1  | Life stress                                                       |                          |                 |                                   |              |                       |
| 2  | Genetics                                                          |                          |                 |                                   |              |                       |
| 3  | Bad luck or chance                                                |                          |                 |                                   |              |                       |
| 4  | The will of God                                                   |                          |                 |                                   |              |                       |
| 5  | Something that happened during the pregnancy with him/her         |                          |                 |                                   |              |                       |
| 6  | Something that I did prior to the pregnancy with him/her          |                          |                 |                                   |              |                       |
| 7  | Something that my partner did prior to the pregnancy with him/her |                          |                 |                                   |              |                       |
| 8  | Stress at birth (i.e., during the delivery)                       |                          |                 |                                   |              |                       |
| 9  | My age or my partner's age                                        |                          |                 |                                   |              |                       |
| 10 | My child's brain structure                                        |                          |                 |                                   |              |                       |
| 11 | Mental attitude or negative views                                 |                          |                 |                                   |              |                       |
| 12 | Toxins found in food                                              |                          |                 |                                   |              |                       |
| 13 | Environmental pollution                                           |                          |                 |                                   |              |                       |
| 14 | A germ or virus                                                   |                          |                 |                                   |              |                       |
| 15 | Poor medical care in the past                                     |                          |                 |                                   |              |                       |
| 16 | My own emotional state                                            |                          |                 |                                   |              |                       |
| 17 | Accident or injury                                                |                          |                 |                                   |              |                       |
| 18 | Problem with my child's immunity                                  |                          |                 |                                   |              |                       |

On the lines below, please rank, in order, the three most important causal factors you believe underlie your child's disease. You may use reasons from the table above or add any other reasons.

For me, the most likely contributing factors are:

1. \_\_\_\_\_

2. \_\_\_\_\_

3. \_\_\_\_\_



## APPENDIX 2 - Custom Open-Ended Survey

**We are interested in hearing directly from parents and caregivers of children with TANGO2-related disorder about the positives, challenges, worries, and hopes they have about their child with TANGO2-related disorder. We are also interested in hearing directly from parents and caregivers about which things they are most hopeful that researchers will focus on, as they study TANGO2-related disorder. Below, please answer the listed questions.**

### **POSITIVES**

What are the three best things about being the parent of a child with TANGO2-related disorder?

---

### **CHALLENGES**

What are the three main challenges about being the parent of a child with TANGO2-related disorder?

---

### **WORRIES**

What are your three main worries about being the parent of a child with TANGO2-related disorder?

---

### **HOPES**

What are your three main hopes about the future for your child with TANGO2-related disorder?

---

### **DESIRED OUTCOMES**

What clinical outcomes are most important to you in your child's health journey? (For instance, improved quality of life, preventing loss of function, and so on)

---

### **RESEARCH "WISH LIST"**

If you could make a "wish list" of topics that researchers would study related to TANGO2-related disorder, what would the TOP THREE topics be?

---

### **OTHER TOPICS**

What other topics do you wish researchers would study related to TANGO2-related disorder?

---
